# Supplementary material
Source: Springer Nature journal article supplement (https://www.springermedizin.de/resource/supplementary/12883_2011_468_MOESM2_ESM.pdf/9455498)

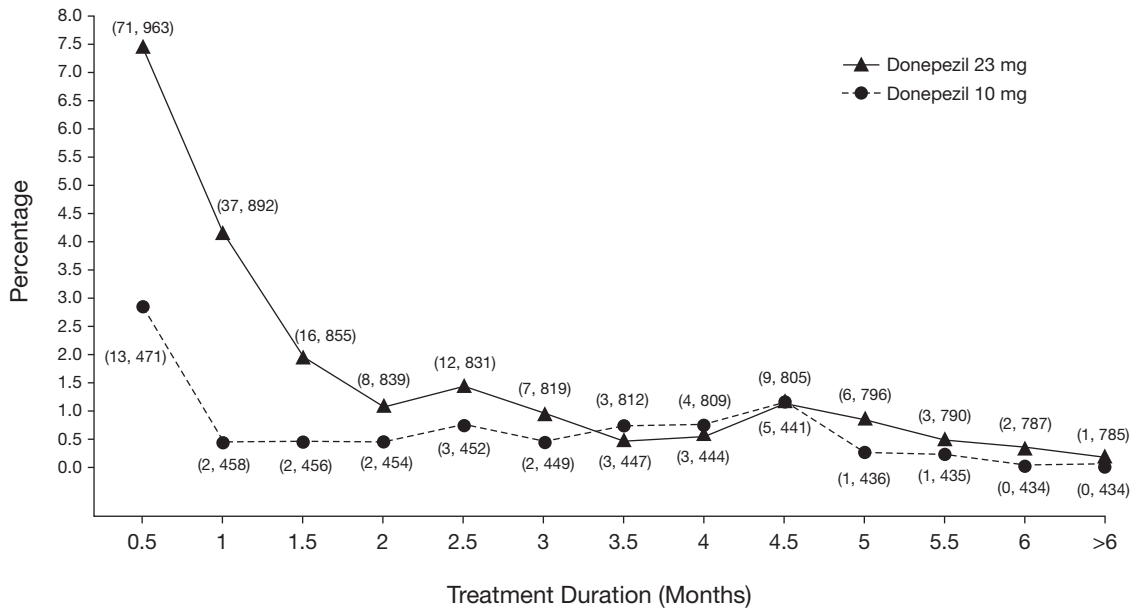

H2558 326 Safety Figure 2

Supplement: MOESM2 [file 9455498]
